# Supplementary material for: Implementation of a new prenatal care model to reduce office visits and increase connectivity and continuity of care: protocol for a mixed-methods study
Source: PubMed Central journal article supplement (PMC4668747; doi:10.1186/s12884-015-0762-2), 2015-12-02
Supplement: 12884_2015_762_MOESM1_ESM.pdf [file 12884_2015_762_MOESM1_ESM.pdf]

## Additional file 1. Patient enrollment exclusion criteria

### Exclusion Criteria:

1. Clinical judgment that determines that the pregnancy is at high risk for complications Any of the following high risk factors would disqualify the mother for the study:
  - i. 37 years of age or greater
  - ii. Severe hypertension (>160/110)
  - iii. Possible ectopic
  - iv. Congenital adrenal hypertension
  - v. Prior PE/DVT/stroke
  - vi. Anticoagulation during prior pregnancy (e.g. antiphospholipid antibody syndrome)
  - vii. Prosthetic heart valve (non-bio)
  - viii. Pulmonary hypertension
  - ix. Mothers currently taking Immunosuppressant's, Prednisone > 10mg per day, antipsychotic (e.g. lithium, Haldol, Zyprexa), chemotherapy
  - x. Recurrent pregnancy loss (>2 losses)
  - xi. Current maternal malignancy
  - xii. Prior myocardial infarction/cardiomyopathy
  - xiii. Bio-prosthetic heart valves
  - xiv. Marfan syndrome
  - xv. Active liver disease (e.g. hepatitis)
  - xvi. Congenital heart disease
  - xvii. Coagulopathies including thrombophilias and bleeding disorders.
  - xviii. Pre-existing diabetes
  - xix. Genetic disease/CF testing/anomalies in prior child
  - xx. Incompetent cervix (prior cerclage)
  - xxi. Twins, Triplets or quads diagnosed by REI or ultrasound.
  - xxii. Isoimmunization (Rh, Kell, etc.)
  - xxiii. History of transplant or currently on Dialysis
  - xxiv. Recurrent pregnancy loss (antiphospholipid antibody syndrome or collagen vascular disease)
  - xxv. Chronic hypertension
  - xxvi. Prior 2<sup>nd</sup> or 3<sup>rd</sup> trimester loss
  - xxvii. HIV
  - xxviii. Inflammatory bowel disease
  - xxix. Asthma and currently on steroid to control disease
